# Supplementary material
Source: PubMed Central journal article supplement (PMC4176606)
Supplement: NIHMS580400-supplement-01.pdf [file NIHMS580400-supplement-01.pdf]

## **Intravenous Ghrelin Administration Increases Alcohol Craving in Alcohol-Dependent Heavy Drinkers: A Preliminary Investigation**

### *Supplemental Information*

#### **Study Population Inclusion/Exclusion Criteria**

##### *Inclusion Criteria:*

- 18-70 years old
- DSM-IV diagnosis of alcohol dependence
- Heavy drinking, which in this study was defined as consuming on average  $\geq 4$  standard drinks/day for women, or  $\geq 5$  standard drinks/day for men, during the 90-day period before screening, as assessed by the Timeline Followback (TLFB). Consistent with the NIH/NIAAA definition, a standard drink was considered any drink that contains about 0.6 fluid ounces or 14 grams of "pure" alcohol.
- Willingness to receive an intravenous line.

##### *Exclusion Criteria:*

- Current DSM-IV diagnosis of dependence on any psychoactive substance other than alcohol and nicotine (a urine drug screen was also performed)
- DSM-IV Axis I criteria for a lifetime diagnosis of schizophrenia, bipolar disorder, or other psychoses
- Current DSM-IV diagnosis of major depressive or anxiety disorder
- Risk of suicide
- History of alcohol intoxication delirium, alcohol withdrawal delirium or seizure
- Clinical Institute Withdrawal Assessment for Alcohol revised score  $\geq 10$

- Having received any behavioral and/or pharmacological treatment for alcohol dependence within the past 30 days and/or being interested in receiving treatment
- Current use of psychotropic medications that could not be discontinued
- Clinically significant medical conditions
- Diabetes or obesity (body mass index  $\geq 30$  kg/m<sup>2</sup>)
- History of clinically significant hypotension
- History of adverse reactions to needle puncture
- Potentially fertile women were admitted only if practicing an effective birth control method (a urine pregnancy test was also performed at each visit).

**Table S1.** Mean and standard deviation for alcohol and juice urge increases and baseline (pre-infusion) levels in the three study groups.\*

|                  | <b>Alcohol Urge Increase</b>      | <b>Juice Urge Increase</b>      |
|------------------|-----------------------------------|---------------------------------|
| Placebo          | 1.851 (2.987)                     | 1.379 (2.996)                   |
| Ghrelin 1 mcg/kg | 2.469 (2.982)                     | 2.670 (2.989)                   |
| Ghrelin 3 mcg/kg | 4.578 (3.012)                     | 2.855 (3.020)                   |
|                  | <b>Alcohol Urge Pre-Infusion†</b> | <b>Juice Urge Pre-Infusion†</b> |
| Placebo          | 3.111 (3.160)                     | 2.611 (2.118)                   |
| Ghrelin 1 mcg/kg | 4.308 (3.591)                     | 2.077 (2.629)                   |
| Ghrelin 3 mcg/kg | 2.429 (3.413)                     | 3.000 (2.882)                   |

\*Dependent variables are collapsed across trials of the same type.

† *p*'s = .35 and .64 respectively.

**Table S2.** Adverse events (AEs; number/group) assessed via the Systematic Assessment for Treatment Emergent Events (SAFTEE)\*

| <b>AE Description</b>                      | <b>Placebo<br/>(n = 18)</b> | <b>Ghrelin 1 mcg/kg<br/>(n = 13)</b> | <b>Ghrelin 3 mcg/kg<br/>(n = 14)</b> |
|--------------------------------------------|-----------------------------|--------------------------------------|--------------------------------------|
| Dizziness                                  | 3                           | 1                                    | 4                                    |
| Decrease in Appetite                       | 2                           | 1                                    | 1                                    |
| Increase in Appetite                       | 11                          | 11                                   | 11                                   |
| Changes in Vision                          | 2                           | 1                                    | 1                                    |
| Slowness, Sleepiness, Fatigue              | 5                           | 0                                    | 1                                    |
| Difficulty with Coordination or Balance    | 1                           | 0                                    | 0                                    |
| Difficulty with Concentration or Attention | 2                           | 1                                    | 0                                    |
| Tingling in Fingers or Toes                | 2                           | 0                                    | 0                                    |
| Word Finding Difficulties                  | 3                           | 0                                    | 0                                    |
| Memory Difficulties                        | 1                           | 1                                    | 1                                    |
| Change in Taste                            | 2                           | 1                                    | 2                                    |
| Tremor                                     | 2                           | 0                                    | 1                                    |
| Constipation                               | 1                           | 0                                    | 0                                    |
| Diarrhea                                   | 1                           | 0                                    | 0                                    |
| Headache                                   | 7                           | 3                                    | 1                                    |
| Restlessness                               | 5                           | 1                                    | 4                                    |
| Nervousness or Anxiety                     | 3                           | 2                                    | 2                                    |
| Irritability                               | 2                           | 0                                    | 2                                    |
| Depression or Mood Disturbances            | 2                           | 0                                    | 2                                    |
| Changes in Libido                          | 0                           | 1                                    | 1                                    |
| Slowed Breathing                           | 0                           | 0                                    | 1                                    |
| Hyperventilation                           | 1                           | 0                                    | 0                                    |
| Difficult Breathing                        | 0                           | 0                                    | 1                                    |
| Stupor                                     | 2                           | 0                                    | 0                                    |
| Fast Heart Beat                            | 2                           | 1                                    | 0                                    |
| Flushing of Face                           | 2                           | 1                                    | 1                                    |
| Muscle Aches                               | 4                           | 1                                    | 0                                    |
| Eye Pain                                   | 1                           | 0                                    | 0                                    |
| Any of 20 through 23                       | 6                           | 2                                    | 4                                    |

\*no significant differences in AEs were found across groups ( $p$ 's > 0.05). AEs listed in the table are only those for which at least 1 case was reported.

**Table S3.** Mean and standard deviation for mean arterial pressure (MAP; expressed in mmHg) and heart rate (HR; expressed in beats per minute) for each trial.\*

|            |                  | <b>1<sup>st</sup> Alcohol Cue<br/>Trial</b> | <b>2<sup>nd</sup> Alcohol Cue<br/>Trial</b> | <b>1st Juice Cue<br/>Trial</b> | <b>2<sup>nd</sup> Juice Cue<br/>Trial</b> |
|------------|------------------|---------------------------------------------|---------------------------------------------|--------------------------------|-------------------------------------------|
|            |                  | <b>Mean (SD)</b>                            | <b>Mean (SD)</b>                            | <b>Mean (SD)</b>               | <b>Mean (SD)</b>                          |
|            | Placebo          | 98.6 (5.5)                                  | 101.5 (7.7)                                 | 98.4 (7.1)                     | 99.2 (5.6)                                |
| <b>MAP</b> | Ghrelin 1 mcg/kg | 93.7 (5.4)                                  | 94.9 (7.4)                                  | 92.7 (6.8)                     | 93.8 (5.4)                                |
|            | Ghrelin 3 mcg/kg | 89.9 (5.3)                                  | 89.3 (7.5)                                  | 89.1 (6.8)                     | 88.5 (5.3)                                |
|            | Placebo          | 69.7 (6.1)                                  | 69.1 (4.8)                                  | 72.7 (5.6)                     | 70.2 (5.4)                                |
| <b>HR</b>  | Ghrelin 1 mcg/kg | 67.0 (5.9)                                  | 66.8 (4.8)                                  | 69.0 (5.6)                     | 65.4 (5.4)                                |
|            | Ghrelin 3 mcg/kg | 67.9 (6.1)                                  | 65.0 (4.8)                                  | 70.1 (5.7)                     | 65.9 (5.5)                                |

\* Multiple measurements were taken during each trial in the 3 study groups.

**Table S4.** Mean and standard deviation for saliva mass, in the three study groups.\*

|                  | <b>Alcohol Trials</b>          | <b>Juice Trials</b>            |
|------------------|--------------------------------|--------------------------------|
|                  | <b>Saliva Mass<br/>(grams)</b> | <b>Saliva Mass<br/>(grams)</b> |
| Placebo          | 3.2 (1.4)                      | 3.3 (1.1)                      |
| Ghrelin 1 mcg/kg | 1.8 (1.4)                      | 1.9 (1.1)                      |
| Ghrelin 3 mcg/kg | 1.9 (1.4)                      | 1.9 (1.1)                      |

\*Dependent variables are collapsed across trials of the same type.

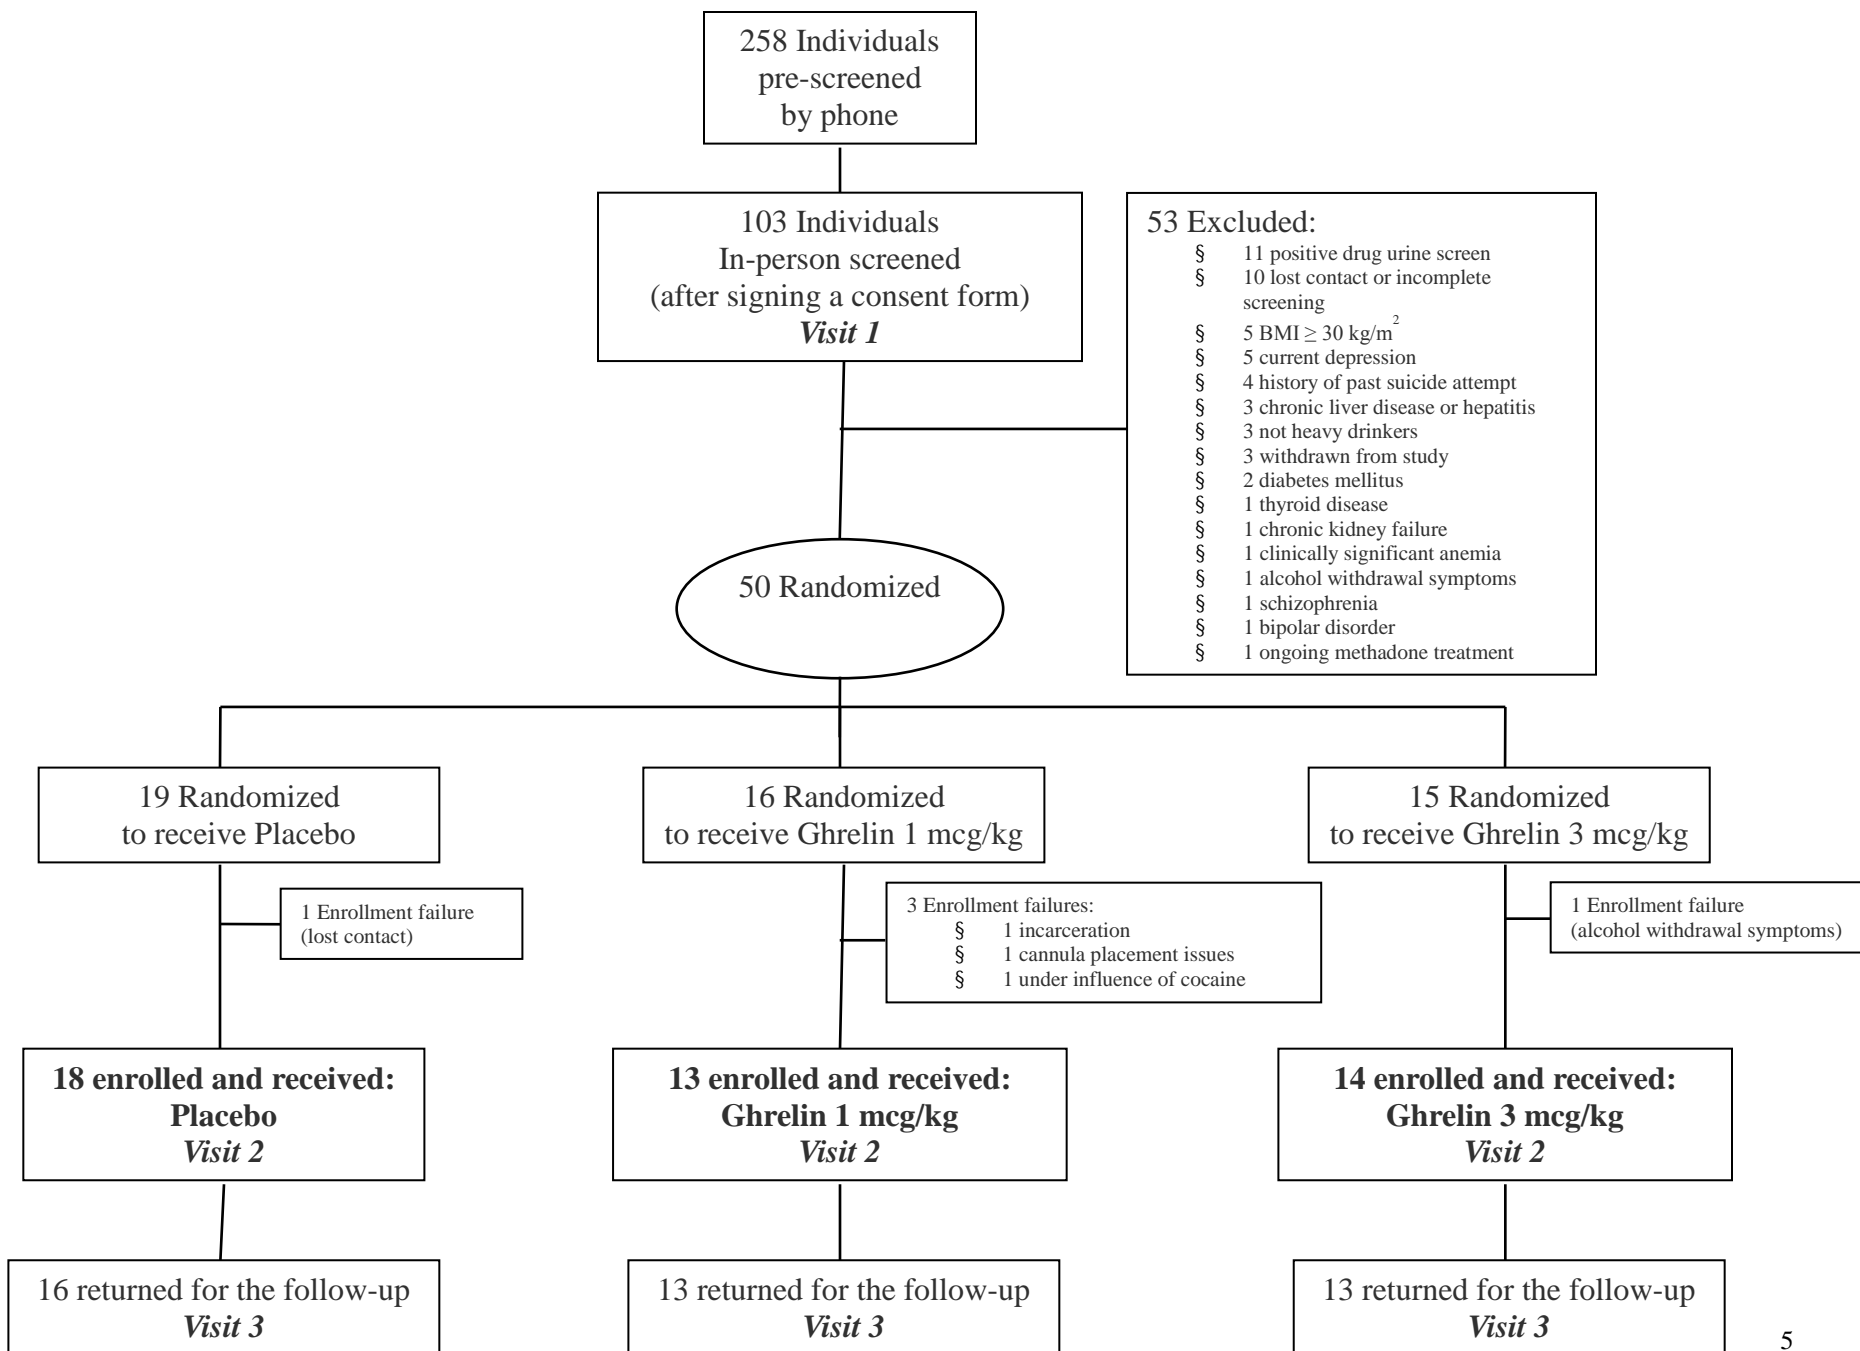

**Figure S1.** Trial flow-chart and profile. After screening (Visit 1), the 50 eligible individuals were urn randomized to ghrelin 1 mcg/kg, 3 mcg/kg, or 0 mcg/kg (placebo) based on the urn variables assessed at screening, i.e., gender, severity of alcohol-dependence (measured with the alcohol dependence scale), and alcohol craving (Alcohol-Visual Analogue Scale). As expected, the three groups did not differ significantly on the three urn variables. Randomization took place between Visit 1 and Visit 2. Five of the 50 participants failed enrollment on Visit 2, while 45 participants did receive the study drug, specifically 18 (95%) of the placebo subjects, 13 (81%) of the low dose ghrelin subjects, and 14 (93%) of the high dose ghrelin subjects. These attrition rates were not significantly different [ $X^2(1, N = 50) = 2.02, p = .36$ ]. Analyses included all participants ( $n = 45$ ) who were randomized and received at least one dose of study drug (which, in this case, was equivalent to receiving the whole study drug, given that this was a single-administration drug study).

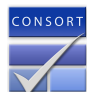
**CONSORT 2010 checklist of information to include when reporting a randomised trial\***

| Section/Topic                    | Item No | Checklist item                                                                                                                                                                              | Reported on page No |
|----------------------------------|---------|---------------------------------------------------------------------------------------------------------------------------------------------------------------------------------------------|---------------------|
| <b>Title and abstract</b>        |         |                                                                                                                                                                                             |                     |
|                                  | 1a      | Identification as a randomised trial in the title                                                                                                                                           | 1                   |
|                                  | 1b      | Structured summary of trial design, methods, results, and conclusions (for specific guidance see CONSORT for abstracts)                                                                     | 3                   |
| <b>Introduction</b>              |         |                                                                                                                                                                                             |                     |
| Background and objectives        | 2a      | Scientific background and explanation of rationale                                                                                                                                          | 4-5                 |
|                                  | 2b      | Specific objectives or hypotheses                                                                                                                                                           | 5                   |
| <b>Methods</b>                   |         |                                                                                                                                                                                             |                     |
| Trial design                     | 3a      | Description of trial design (such as parallel, factorial) including allocation ratio                                                                                                        | 5-6                 |
|                                  | 3b      | Important changes to methods after trial commencement (such as eligibility criteria), with reasons                                                                                          | 6                   |
| Participants                     | 4a      | Eligibility criteria for participants                                                                                                                                                       | 6                   |
|                                  | 4b      | Settings and locations where the data were collected                                                                                                                                        | 5-6                 |
| Interventions                    | 5       | The interventions for each group with sufficient details to allow replication, including how and when they were actually administered                                                       | 6-8                 |
| Outcomes                         | 6a      | Completely defined pre-specified primary and secondary outcome measures, including how and when they were assessed                                                                          | 5, 9-11             |
|                                  | 6b      | Any changes to trial outcomes after the trial commenced, with reasons                                                                                                                       | N/A                 |
| Sample size                      | 7a      | How sample size was determined                                                                                                                                                              | 9                   |
|                                  | 7b      | When applicable, explanation of any interim analyses and stopping guidelines                                                                                                                | N/A                 |
| <b>Randomisation:</b>            |         |                                                                                                                                                                                             |                     |
| Sequence generation              | 8a      | Method used to generate the random allocation sequence                                                                                                                                      | 21                  |
|                                  | 8b      | Type of randomisation; details of any restriction (such as blocking and block size)                                                                                                         | 21                  |
| Allocation concealment mechanism | 9       | Mechanism used to implement the random allocation sequence (such as sequentially numbered containers), describing any steps taken to conceal the sequence until interventions were assigned | 21                  |
| Implementation                   | 10      | Who generated the random allocation sequence, who enrolled participants, and who assigned participants to interventions                                                                     | 21                  |

|                                                      |     |                                                                                                                                                   |             |
|------------------------------------------------------|-----|---------------------------------------------------------------------------------------------------------------------------------------------------|-------------|
| Blinding                                             | 11a | If done, who was blinded after assignment to interventions (for example, participants, care providers, those assessing outcomes) and how          | 5-6         |
|                                                      | 11b | If relevant, description of the similarity of interventions                                                                                       | N/A         |
| Statistical methods                                  | 12a | Statistical methods used to compare groups for primary and secondary outcomes                                                                     | 8-9         |
|                                                      | 12b | Methods for additional analyses, such as subgroup analyses and adjusted analyses                                                                  | 8-9         |
| <b>Results</b>                                       |     |                                                                                                                                                   |             |
| Participant flow (a diagram is strongly recommended) | 13a | For each group, the numbers of participants who were randomly assigned, received intended treatment, and were analysed for the primary outcome    | 9           |
|                                                      | 13b | For each group, losses and exclusions after randomisation, together with reasons                                                                  | 9, Figure 1 |
| Recruitment                                          | 14a | Dates defining the periods of recruitment and follow-up                                                                                           | 9           |
|                                                      | 14b | Why the trial ended or was stopped                                                                                                                | N/A         |
| Baseline data                                        | 15  | A table showing baseline demographic and clinical characteristics for each group                                                                  | 9           |
| Numbers analysed                                     | 16  | For each group, number of participants (denominator) included in each analysis and whether the analysis was by original assigned groups           | 9           |
| Outcomes and estimation                              | 17a | For each primary and secondary outcome, results for each group, and the estimated effect size and its precision (such as 95% confidence interval) | 9-10        |
|                                                      | 17b | For binary outcomes, presentation of both absolute and relative effect sizes is recommended                                                       | N/A         |
| Ancillary analyses                                   | 18  | Results of any other analyses performed, including subgroup analyses and adjusted analyses, distinguishing pre-specified from exploratory         | 10-11       |
| Harms                                                | 19  | All important harms or unintended effects in each group (for specific guidance see CONSORT for harms)                                             | N/A         |
| <b>Discussion</b>                                    |     |                                                                                                                                                   |             |
| Limitations                                          | 20  | Trial limitations, addressing sources of potential bias, imprecision, and, if relevant, multiplicity of analyses                                  | 16          |
| Generalisability                                     | 21  | Generalisability (external validity, applicability) of the trial findings                                                                         | 16          |
| Interpretation                                       | 22  | Interpretation consistent with results, balancing benefits and harms, and considering other relevant evidence                                     | 11-17       |
| <b>Other information</b>                             |     |                                                                                                                                                   |             |
| Registration                                         | 23  | Registration number and name of trial registry                                                                                                    | 1           |
| Protocol                                             | 24  | Where the full trial protocol can be accessed, if available                                                                                       | 1           |
| Funding                                              | 25  | Sources of funding and other support (such as supply of drugs), role of funders                                                                   | 17          |
